# Supplementary material for: Aethionema arabicum: a novel model plant to study the light control of seed germination
Source: PubMed Central journal article supplement — J Exp Bot. 2019 Apr 5;70(12):3313–28. doi: 10.1093/jxb/erz146 (PMC6598081; doi:10.1093/jxb/erz146), 2019-04-05
Supplement: erz146_suppl_supplementary_figures_s1-s6.pdf [file erz146_suppl_supplementary_figures_s1-s6.pdf]

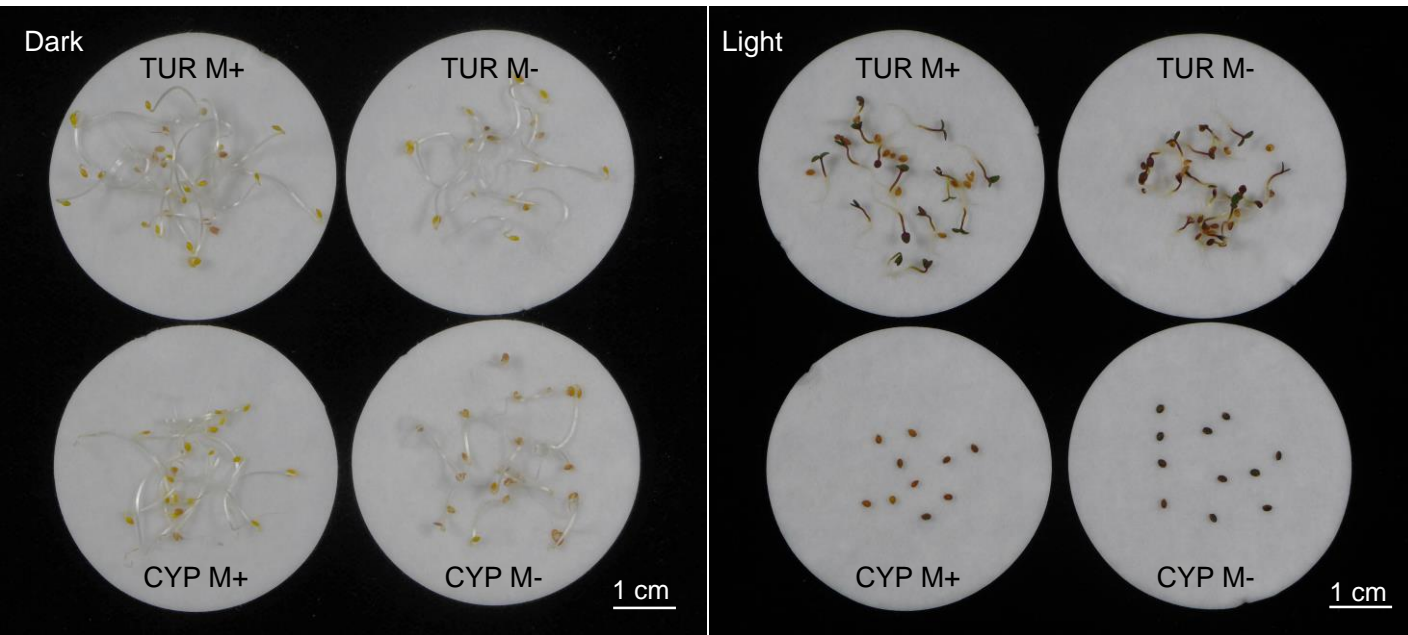

**Supporting Figure 1.** Germination of dimorphic seed types in response to light. Germination of mucilaginous (M+) and non-mucilaginous (M-) seeds were tested from TUR and CYP accessions in dark or under white light ( $100 \mu\text{mol m}^{-2} \text{s}^{-1}$ ). Images were taken 7 days after imbibition.

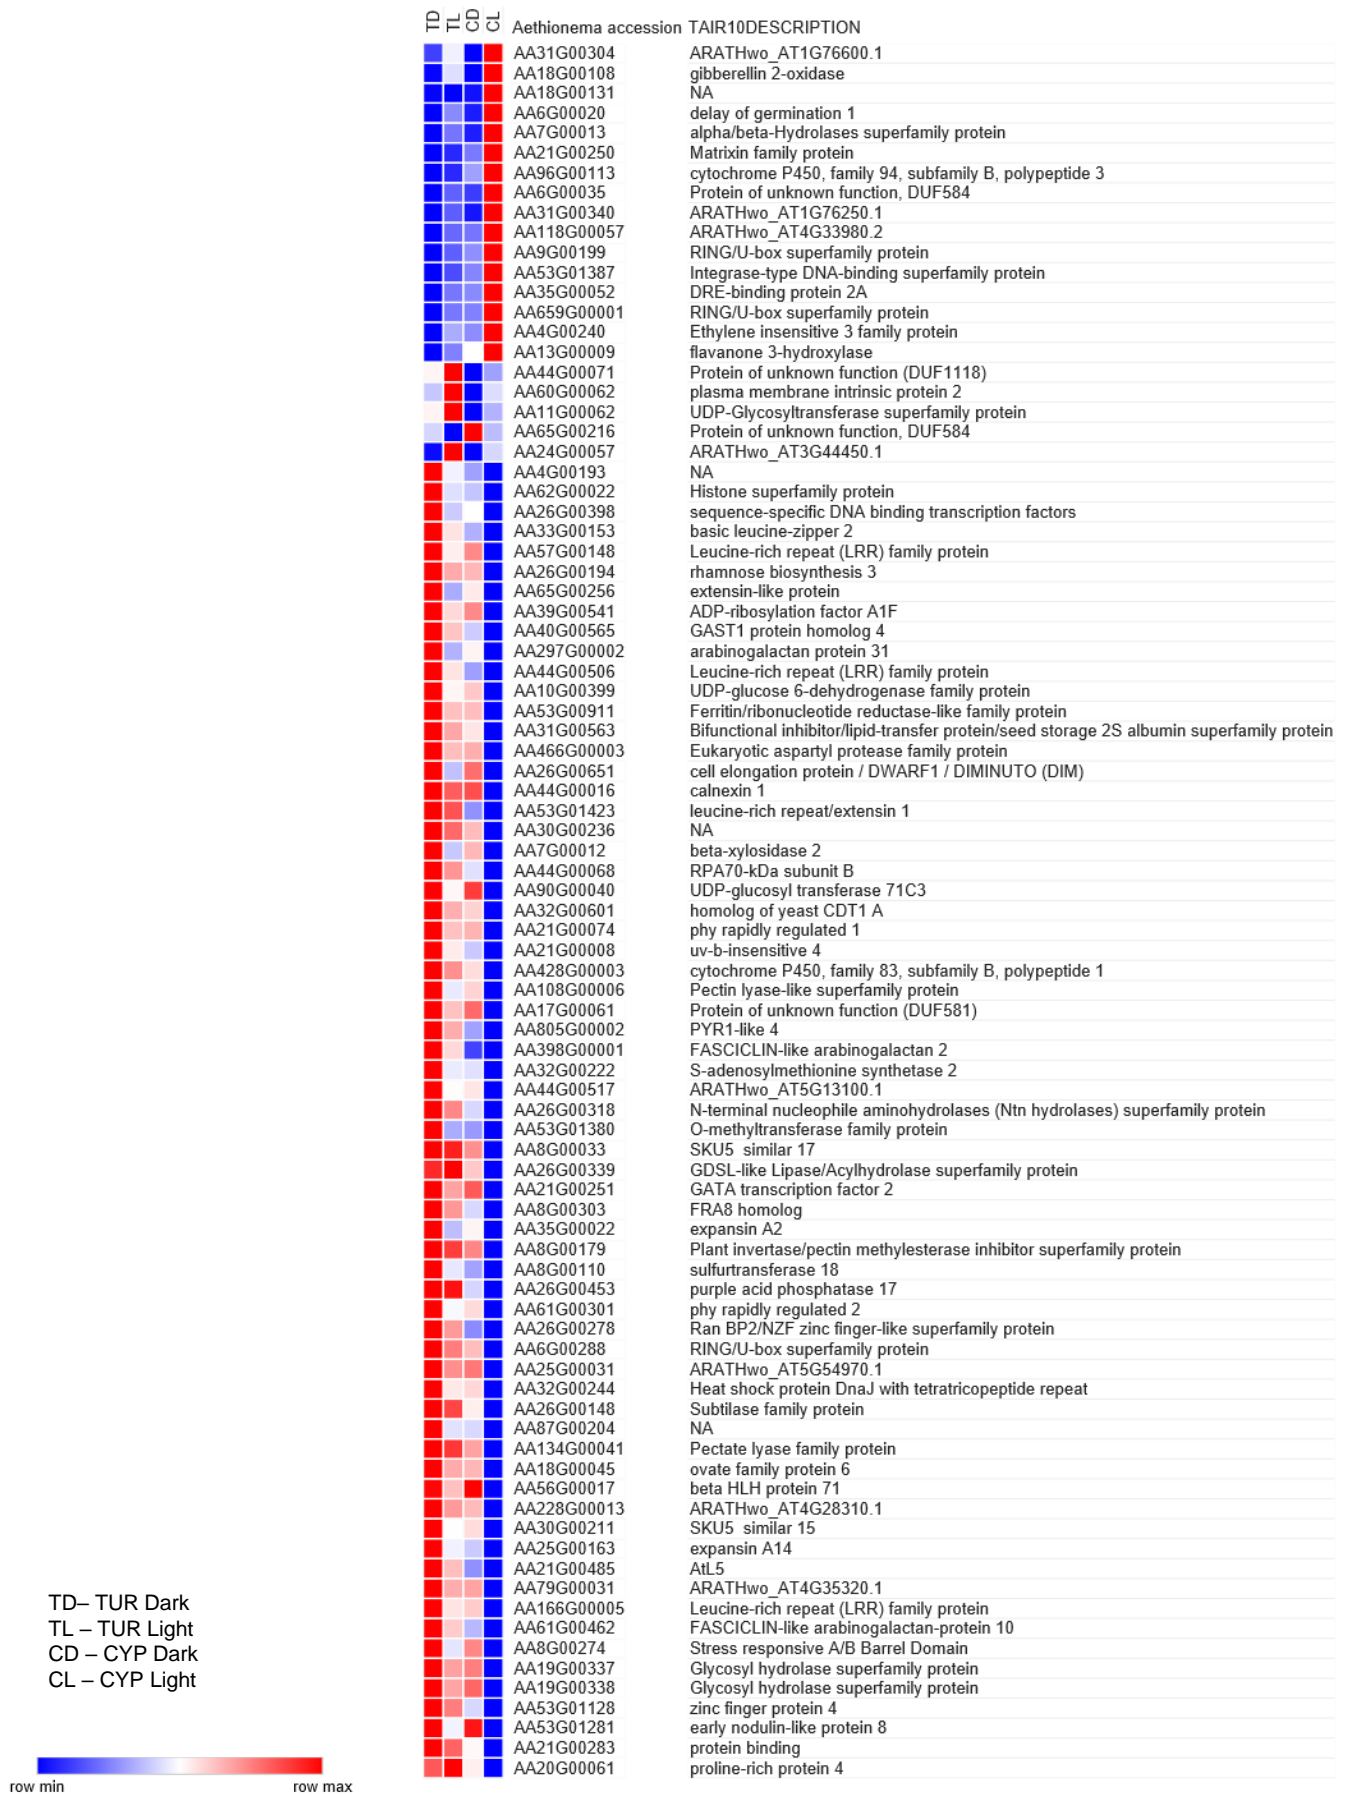

**Supporting Figure 2.** Heatmap of all 87 genes light-regulated in CYP seeds and differentially expressed in light-exposed TUR and CYP seeds based on RPKM values.

A

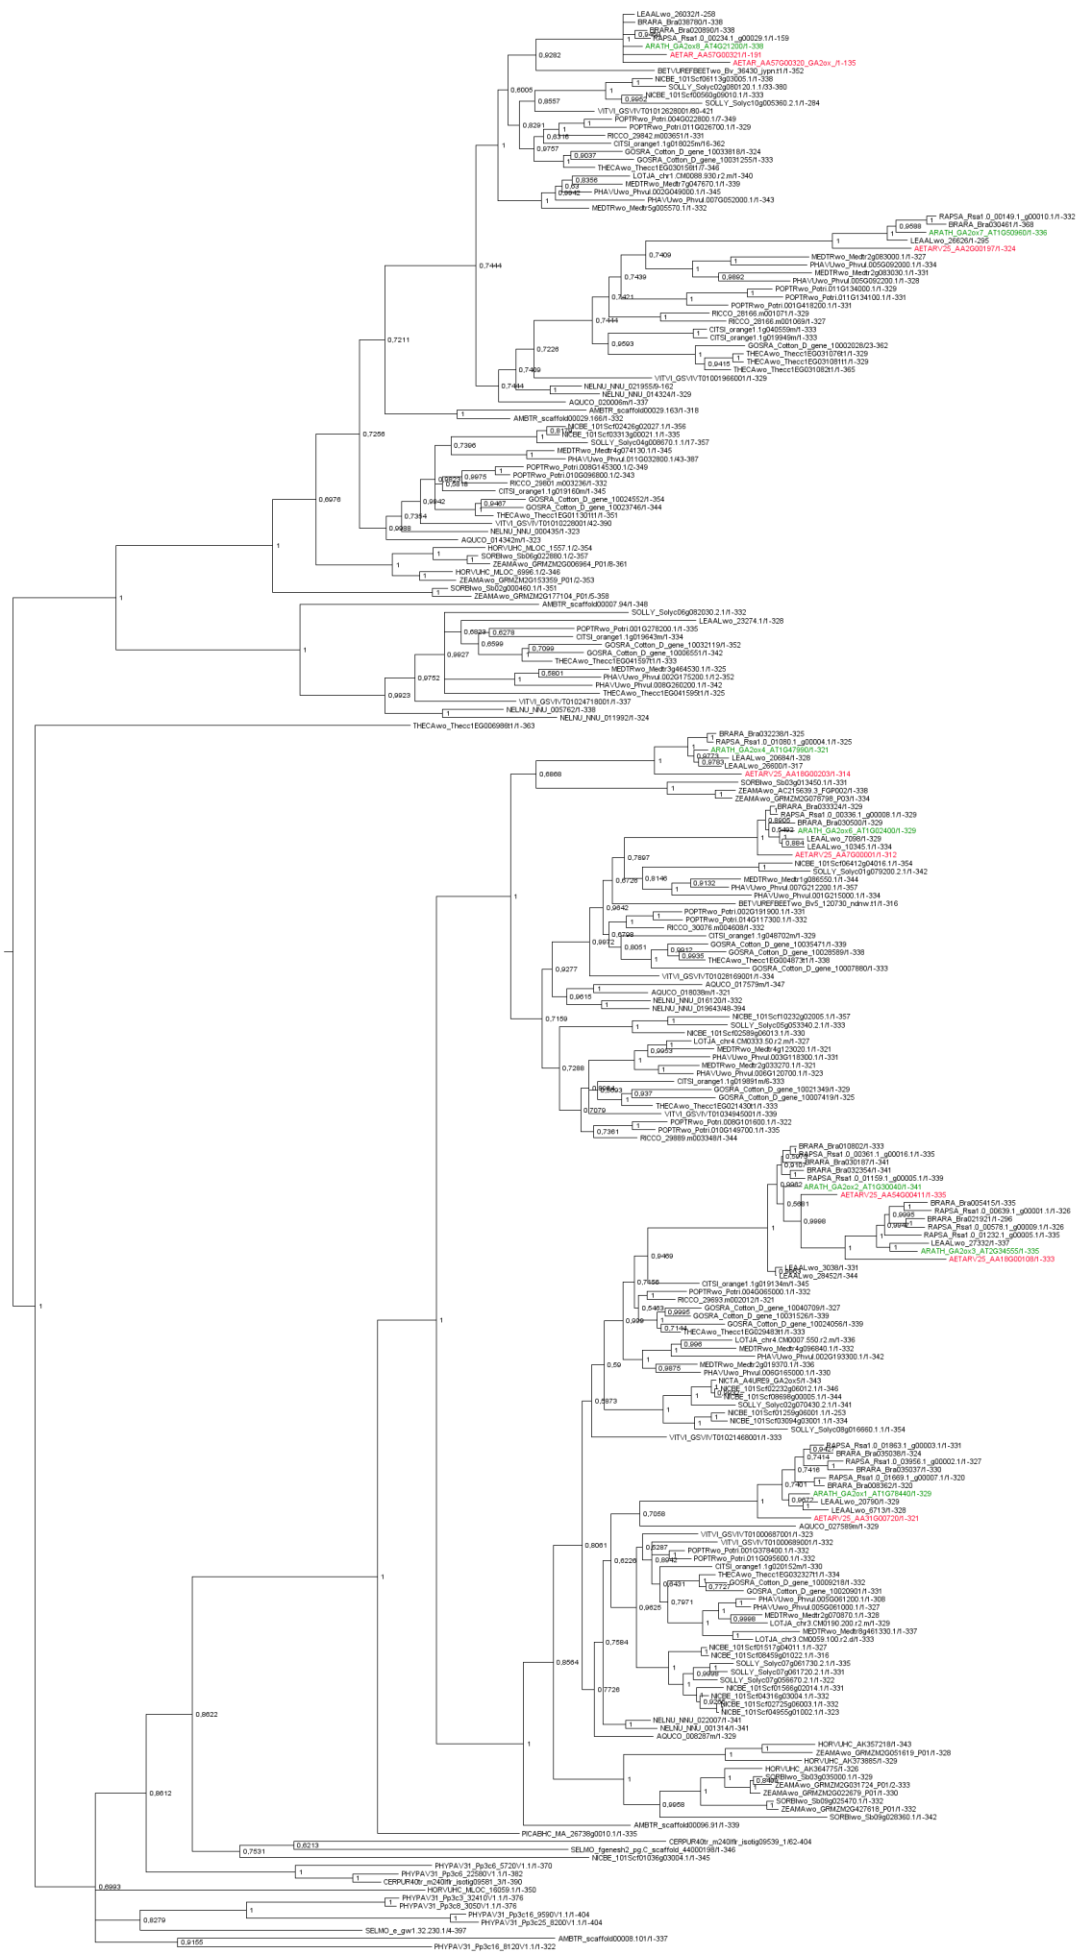

Supporting Figure 3

**B**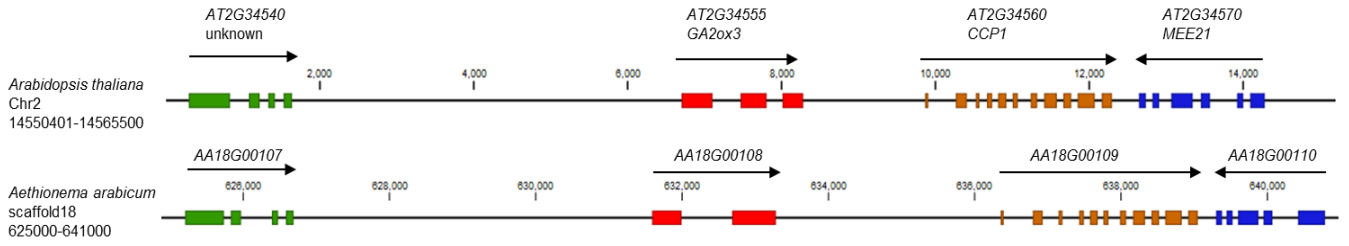

**Supporting Figure 3.** Identification of the *A. thaliana* orthologue of *Ae. arabicum* AA18G00108 as *GA2ox3*.

(a) Phylogenetic tree of gibberelin2-oxidases using Bayesian inference (2000000 generations, standard deviation of split frequencies 0.063371) and allows clear assignment of *Ae. arabicum* orthologues. Sequences of *A. thaliana* (ARATH) and *Ae. arabicum* (AETAR) are marked in green and red, respectively. For detailed assignment of five letter code see Supplemental Dataset 7. (b) Synteny of *GA2ox3* position in the genome of *A. thaliana* and *Ae. arabicum*.

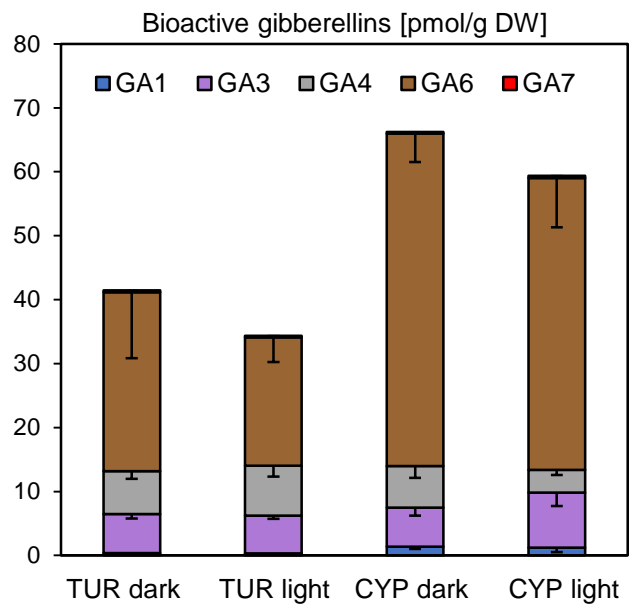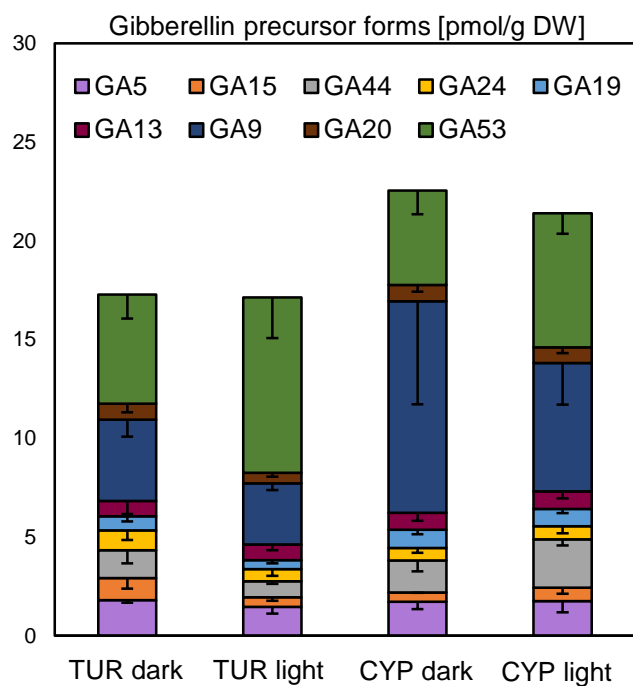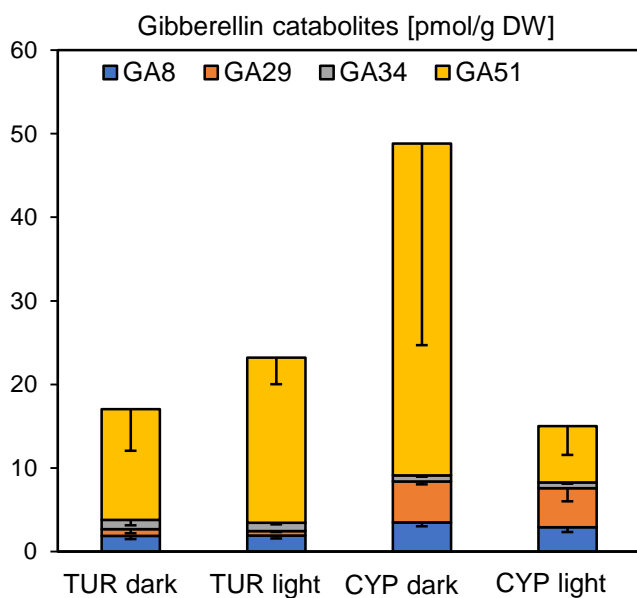

**Supporting Figure 4.** Accumulation of GA forms in *Ae. arabicum* TUR and CYP seeds under dark and light conditions.

A

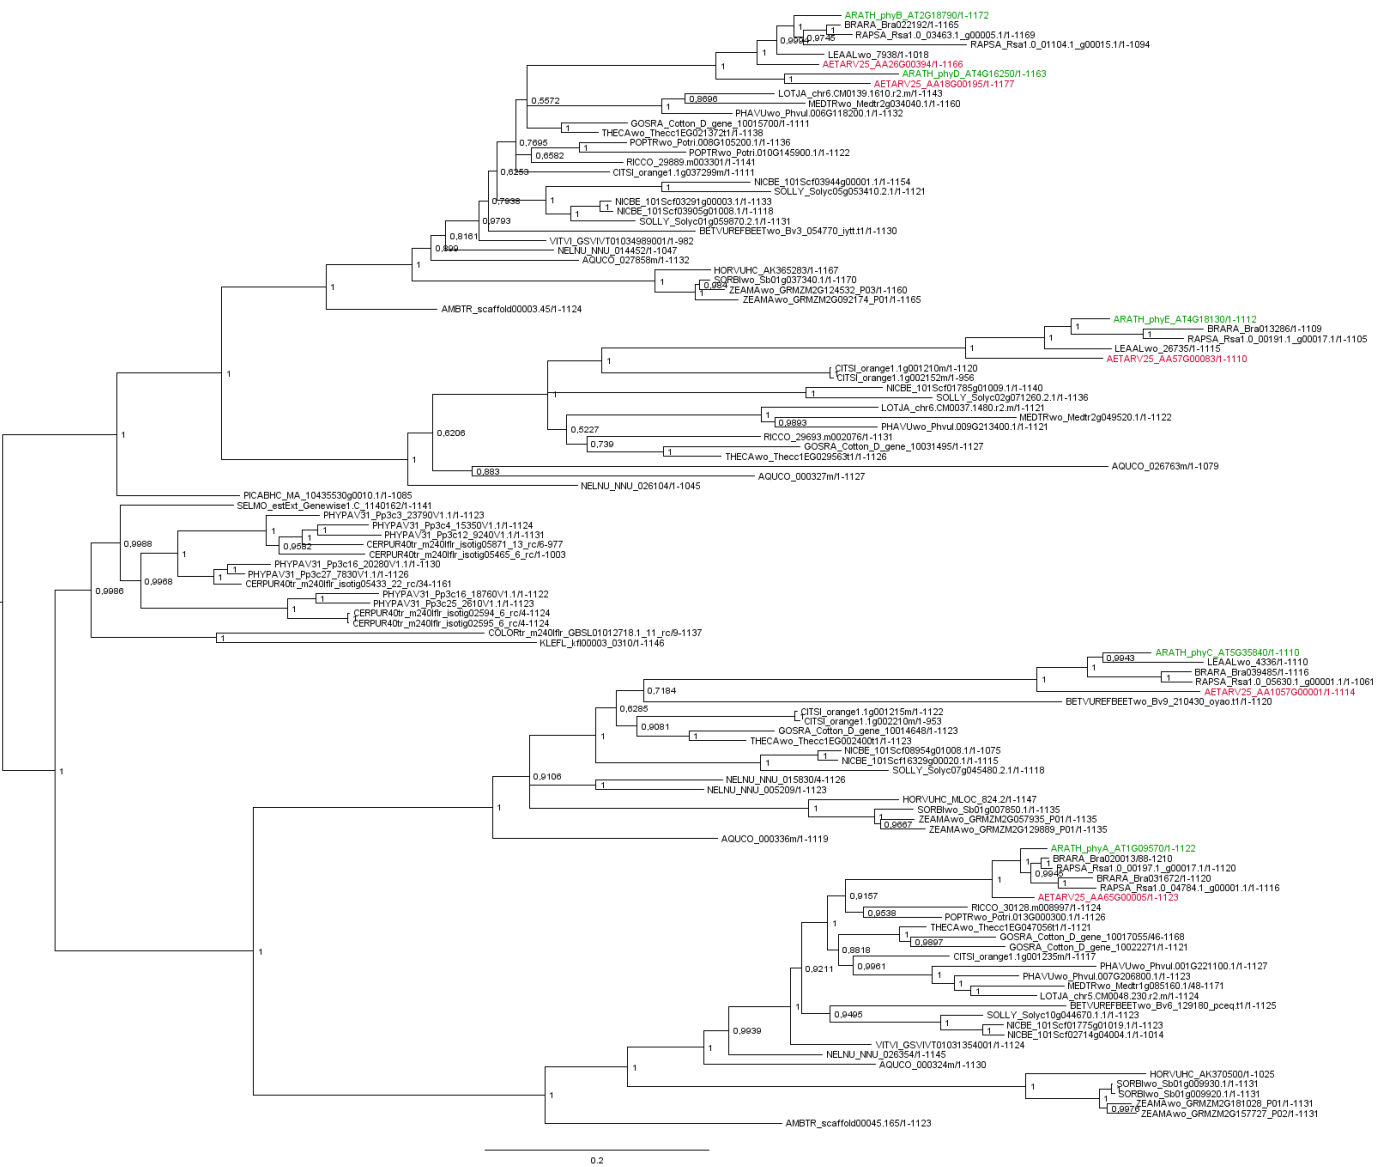

B

|             |                     |                     |                     |                     |                     |                     |                     |                     |                     |                     |       |
|-------------|---------------------|---------------------|---------------------|---------------------|---------------------|---------------------|---------------------|---------------------|---------------------|---------------------|-------|
|             |                     |                     | 20                  |                     | 40                  |                     | 60                  |                     | 80                  |                     | 100   |
| PHYA_TUR    | MSGARPSHSS          | EGSRRSRHSA          | R I I A Q T T V D A | K L H A D F E E S G | S S F D Y S S S V R | V T G P V V E N Q P | P R S D K V T T T Y | L H H I Q K G K L I | Q P F G C L L A L D | E K T F K V I A Y S | 100   |
| PHYA_CYP    | MSGARPSHSS          | EGSRRSRHSA          | R I I A Q T T V D A | K L H A D F E E S G | S S F D Y S S S V R | V T G P V V E N Q P | P R S D K V T T T Y | L H H I Q K G K L I | Q P F G C L L A L D | E K T F K V I A Y S | 100   |
| PHYA_KM2397 | MSGARPSHSS          | EGSRRSRHSA          | R I I A Q T T V D A | K L H A D F E E S G | S S F D Y S S S V R | V T G P V V E N Q P | P R S D K V T T T Y | L H H I Q K G K L I | Q P F G C L L A L D | E K T F K V I A Y S | 100   |
|             |                     |                     | 120                 |                     | 140                 |                     | 160                 |                     | 180                 |                     | 200   |
| PHYA_TUR    | ENASELLTMA          | SHAVPSVGEH          | P V L G I G T D I K | T L F T A P S A S A | L Q K A L G F G D V | S L L N P I L V H C | K T S A K P F Y A I | V H R V T G S I I V | D F E P V K P Y E V | P M T A A G A L Q S | 200   |
| PHYA_CYP    | ENASELLTMA          | SHAVPSVGEH          | P V L G I G T D I K | T L F T A P S A S A | L Q K A L G F G D V | S L L N P I L V H C | K T S A K P F Y A I | V H R V T G S I I V | D F E P V K P Y E V | P M T A A G A L Q S | 200   |
| PHYA_KM2397 | ENASELLTMA          | SHAVPSVGEH          | P V L G I G T D I K | T L F T A P S A S A | L Q K A L G F G D V | S L L N P I L V H C | K T S A K P F Y A I | V H R V T G S I I V | D F E P V K P Y E V | P M T A A G A L Q S | 200   |
|             |                     |                     | 220                 |                     | 240                 |                     | 260                 |                     | 280                 |                     | 300   |
| PHYA_TUR    | YKLAAKA I T R       | L Q S L P S G S M E | R L C D T M V Q E V | F E L T G Y D R V M | A Y K F H E D D H G | E V V S E V T K P G | L E P Y L G L H Y P | A T D I P Q A A R F | L F M K N K V R M I | V D C C A K H V R V | 300   |
| PHYA_CYP    | YKLAAKA I T R       | L Q S L P S G S M E | R L C D T M V Q E V | F E L T G Y D R V M | A Y K F H E D D H G | E V V S E V T K P G | L E P Y L G L H Y P | A T D I P Q A A R F | L F M K N K V R M I | V D C C A K H V R V | 300   |
| PHYA_KM2397 | YKLAAKA I T R       | L Q S L P S G S M E | R L C D T M V Q E V | F E L T G Y D R V M | A Y K F H E D D H G | E V V S E V T K P G | L E P Y L G L H Y P | A T D I P Q A A R F | L F M K N K V R M I | V D C C A K H V R V | 300   |
|             |                     |                     | 320                 |                     | 340                 |                     | 360                 |                     | 380                 |                     | 400   |
| PHYA_TUR    | L Q D E K L S F D L | T L C G S T L R A P | H S C H L Q Y M E N | M N S I A S L V M A | V V V N E E D G G G | E G E A Q D S T Q P | Q K R K K L W G L V | V C H N T T P R F V | P F P L R Y A C E F | L A Q V F A I H V N | 400   |
| PHYA_CYP    | L Q D E K L S F D L | T L C G S T L R A P | H S C H L Q Y M E N | M N S I A S L V M A | V V V N E E D G G G | E G E A Q D S T Q P | Q K R K K L W G L V | V C H N T T P R F V | P F P L R Y A C E F | L A Q V F A I H V N | 400   |
| PHYA_KM2397 | L Q D E K L S F D L | T L C G S T L R A P | H S C H L Q Y M E N | M N S I A S L V M A | V V V N E E D G G G | E G E A Q D S T Q P | Q K R K K L W G L V | V C H N T T P R F V | P F P L R Y A C E F | L A Q V F A I H V N | 400   |
|             |                     |                     | 420                 |                     | 440                 |                     | 460                 |                     | 480                 |                     | 500   |
| PHYA_TUR    | K E V E L D N Q I V | E K N I L R T Q T L | L C D M L M R D A P | L G I V T Q S P N I | M D L V K C D G A A | L L Y N D K I W K L | G I T P T E T Q L Q | E I G N W L C E Y H | M D S T G L S T D S | L H D A G F P R A L | 500   |
| PHYA_CYP    | K E V E L D N Q I V | E K N I L R T Q T L | L C D M L M R D A P | L G I V T Q S P N I | M D L V K C D G A A | L L Y N D K I W K L | G I T P T E T Q L Q | E I G N W L C E Y H | M D S T G L S T D S | L H D A G F P R A L | 500   |
| PHYA_KM2397 | K E V E L D N Q I V | E K N I L R T Q T L | L C D M L M R D A P | L G I V T Q S P N I | M D L V K C D G A A | L L Y N D K I W K L | G I T P T E T Q L Q | E I G N W L C E Y H | M D S T G L S T D S | L H D A G F P R A L | 500   |
|             |                     |                     | 520                 |                     | 540                 |                     | 560                 |                     | 580                 |                     | 600   |
| PHYA_TUR    | A L G D S V C G M A | A V R I S S K D M I | F W F R S H T A G E | I R W G G A K H D P | D D K D D A R R M H | P R S S F K A F L E | V V K T R S L P W K | D Y E M D A I H S L | Q L I L R N A P K D | I E A S N V N T K T | 600   |
| PHYA_CYP    | A L G D S V C G M A | A V R I S S K D M I | F W F R S H T A G E | I R W G G A K H D P | D D K D D A R R M H | P R S S F K A F L E | V V K T R S L P W K | D Y E M D A I H S L | Q L I L R N A P K D | I E A S N V N T K T | 600   |
| PHYA_KM2397 | A L G D S V C G M A | A V R I S S K D M I | F W F R S H T A G E | I R W G G A K H D P | D D K D D A R R M H | P R S S F K A F L E | V V K T R S L P W K | D Y E M D A I H S L | Q L I L R N A P K D | I E A S N V N T K T | 600   |
|             |                     |                     | 620                 |                     | 640                 |                     | 660                 |                     | 680                 |                     | 700   |
| PHYA_TUR    | I H S K L N D L K L | D G I Q E L E A V T | S E M V R L I E T A | T V P I L A V D A D | G L V N G W N T K I | A E L T G L M V D E | A I G K H L L S L V | E D S S V E R V K K | M L E M A L E G T E | E Q D V Q F E I K T | 700   |
| PHYA_CYP    | I H S K L N D L K L | D G I Q E L E A V T | S E M V R L I E T A | T V P I L A V D A D | G L V N G W N T K I | A E L T G L M V D E | A I G K H L L S L V | E D S S V E R V K K | M L E M A L E G T E | E Q D V Q F E I K T | 700   |
| PHYA_KM2397 | I H S K L N D L K L | D G I Q E L E A V T | S E M V R L I E T A | T V P I L A V D A D | G L V N G W N T K I | A E L T G L M V D E | A I G K H L L S L V | E D S S V E R V K K | M L E M A L E G T E | E Q D V Q F E I K T | 700   |
|             |                     |                     | 720                 |                     | 740                 |                     | 760                 |                     | 780                 |                     | 800   |
| PHYA_TUR    | H L S R A D A G P I | S L V V N A C A S R | D L N E V V V G V C | F V A Q D L T G Q K | N V M D K F T R I E | G D Y K A I I Q N P | N P L I P P I F G T | D E F G W C T E W N | P A M S K L T G L K | R E E V I D K M L L | 800   |
| PHYA_CYP    | H L S R A D A G P I | S L V V N A C A S R | D L N E V V V G V C | F V A Q D L T G Q K | N V M D K F T R I E | G D Y K A I I Q N P | N P L I P P I F G T | D E F G W C T E W N | P A M S K L T G L K | R E E V I D K M L L | 800   |
| PHYA_KM2397 | H L S R A D A G P I | S L V V N A C A S R | D L N E V V V G V C | F V A Q D L T G Q K | N V M D K F T R I E | G D Y K A I I Q N P | N P L I P P I F G T | D E F G W C T E W N | P A M S K L T G L K | R E E V I D K M L L | 800   |
|             |                     |                     | 820                 |                     | 840                 |                     | 860                 |                     | 880                 |                     | 900   |
| PHYA_TUR    | G E V F G T Q K A C | C R L K N Q E A F V | N L G I V L N N A V | T S Q E P K V S F   | A F F T R S G K Y V | E C L L C V S K K L | D R E G V V T G V F | C F L Q L V S H E L | Q A A L H V Q R L A | E R T A L K R L K A | 900   |
| PHYA_CYP    | G E V F G T Q K A C | C R L K N Q E A F V | N L G I V L N N A V | T S Q E P K V S F   | A F F T R S G K Y V | E C L L C V S K K L | D R E G V V T G V F | C F L Q L V S H E L | Q A A L H V Q R L A | E R T A L K R L K A | 900   |
| PHYA_KM2397 | G E V F G T Q K A C | C R L K N Q E A F V | N L G I V L N N A V | T S Q E P K V S F   | A F F T R S G K Y V | E C L L C V S K K L | D R E G V V T G V F | C F L Q L V S H E L | Q A A L H V Q R L A | E R T A L K R L K A | 900   |
|             |                     |                     | 920                 |                     | 940                 |                     | 960                 |                     | 980                 |                     | 1,000 |
| PHYA_TUR    | L A Y I K R Q I R N | P L S G I V F S R K | M M E G T E L G P E | Q R Q I L H T S G L | C Q K Q L S K V L D | D S D L D S I I D G | C L D L E M K E F S | L N E V L T A S T S | Q V M M K S N G K S | V R I T N E T K E E | 1000  |
| PHYA_CYP    | L A Y I K R Q I R N | P L S G I V F S R K | M M E G T E L G P E | Q R Q I L H T S G L | C Q K Q L S K V L D | D S D L D S I I D G | C L D L E M K E F S | L N E V L T A S T S | Q V M M K S N G K S | V R I T N E T K E E | 1000  |
| PHYA_KM2397 | L A Y I K R Q I R N | P L S G I V F S R K | M M E G T E L G P E | Q R Q I L H T S G L | C Q K Q L S K V L D | D S D L D S I I D G | C L D L E M K E F S | L N E V L T A S T S | Q V M M K S N G K S | V R I T N E T K E E | 1000  |
|             |                     |                     | 1,020               |                     | 1,040               |                     | 1,060               |                     | 1,080               |                     | 1,100 |
| PHYA_TUR    | V M S D T L Y G D S | V R L Q Q V L A D F | M F M S V N F T P S | G G Q L D V T A S L | R K D Q L G R S V H | L A Y L E I R L T H | T G A G I P E F L L | N Q M F G T E E D V | S E E G L S L M I S | R K L V K L M N G D | 1100  |
| PHYA_CYP    | V M S D T L Y G D S | V R L Q Q V L A D F | M F M S V N F T P S | G G Q L D V T A S L | R K D Q L G R S V H | L A Y L E I R L T H | T G A G I P E F L L | N Q M F G T E E D V | S E E G L S L M I S | R K L V K L M N G D | 1100  |
| PHYA_KM2397 | V M S D T L Y G D S | V R L Q Q V L A D F | M F M S V N F T P S | G G Q L D V T A S L | R K D Q L G R S V H | L A Y L E I R L T H | T G A G I P E F L L | N Q M F G T E E D V | S E E G L S L M I S | R K L V K L M N G D | 1100  |
|             |                     |                     | 1,120               |                     |                     |                     |                     |                     |                     |                     |       |
| PHYA_TUR    | V Q Y L R Q A G K S | S F I I T A E L A A | ANK 1123            |                     |                     |                     |                     |                     |                     |                     |       |
| PHYA_CYP    | V Q Y L R Q A G K S | S F I I T A E L A A | ANK 1123            |                     |                     |                     |                     |                     |                     |                     |       |
| PHYA_KM2397 | V Q Y L R Q A G K S | S F I I T A E L A A | ANK 1123            |                     |                     |                     |                     |                     |                     |                     |       |

C

|             |                     |                     |                     |                     |                     |                     |                     |                     |                     |                     |     |
|-------------|---------------------|---------------------|---------------------|---------------------|---------------------|---------------------|---------------------|---------------------|---------------------|---------------------|-----|
|             |                     |                     | 20                  |                     | 40                  |                     | 60                  |                     | 80                  |                     | 100 |
| PHYB_TUR    | M V T G D D V G G G | S S G G G R G R G G | E A A S S S Q R V N | T T R R E Q P Q S S | G T K S L R P Q S V | T E S M S K A I Q Q | Y T V D A R L H A V | F E Q S G E S G K S | F D Y S Q S L K T T | T Y G S S V P E Q Q | 100 |
| PHYB_CYP    | M V T G D D V G G G | S S G G G R G R G G | E A A S S S Q R V N | T T R R E Q P Q S S | G T K S L R P Q S V | T E S M S K A I Q Q | Y T V D A R L H A V | F E Q S G E S G K S | F D Y S Q S L K T T | T Y G S S V P E Q Q | 100 |
| PHYB_KM2397 | M V T G D D V G G G | S S G G G R G R G G | E A A S S S Q R V N | T T R R E Q P Q S S | G T K S L R P Q S V | T E S M S K A I Q Q | Y T V D A R L H A V | F E Q S G E S G K S | F D Y S Q S L K T T | T Y G S S V P E Q Q | 100 |
|             |                     |                     | 120                 |                     | 140                 |                     | 160                 |                     | 180                 |                     | 200 |
| PHYB_TUR    | I T A Y L S R I Q R | G G Y I Q P F G C M | I A V D E S T F R I | I G Y S E N A R E M | L G L T P Q S V P S | L E K P E I L S M G | T D V R S L F T P S | S S I L L E R A F V | A R E I T L L N P V | W I H S K N T G K P | 200 |
| PHYB_CYP    | I T A Y L S R I Q R | G G Y I Q P F G C M | I A V D E S T F R I | I G Y S E N A R E M | L G L T P Q S V P S | L E K P E I L S M G | T D V R S L F T P S | S S I L L E R A F V | A R E I T L L N P V | W I H S K N T G K P | 200 |
| PHYB_KM2397 | I T A Y L S R I Q R | G G Y I Q P F G C M | I A V D E S T F R I | I G Y S E N A R E M | L G L T P Q S V P S | L E K P E I L S M G | T D V R S L F T P S | S S I L L E R A F V | A R E I T L L N P V | W I H S K N T G K P | 200 |
|             |                     |                     | 220                 |                     | 240                 |                     | 260                 |                     | 280                 |                     | 300 |
| PHYB_TUR    | F Y A I L H R I D V | G I V I D L E P A R | T E D P A L S I A G | A V Q S Q K L A V R | A I S Q L S L P G   | G D I K L L C D T V | V E S V R D L T G Y | D R V M V Y K F H E | D E H G E V V A E S | K R D D L E P Y I G | 300 |
| PHYB_CYP    | F Y A I L H R I D V | G I V I D L E P A R | T E D P A L S I A G | A V Q S Q K L A V R | A I S Q L S L P G   | G D I K L L C D T V | V E S V R D L T G Y | D R V M V Y K F H E | D E H G E V V A E S | K R D D L E P Y I G | 300 |
| PHYB_KM2397 | F Y A I L H R I D V | G I V I D L E P A R | T E D P A L S I A G | A V Q S Q K L A V R | A I S Q L S L P G   | G D I K L L C D T V | V E S V R D L T G Y | D R V M V Y K F H E | D E H G E V V A E S | K R D D L E P Y I G | 300 |
|             |                     |                     | 320                 |                     | 340                 |                     | 360                 |                     | 380                 |                     | 400 |
| PHYB_TUR    | L H Y P A T D I P Q | A S R F L F K Q N R | V R M I V D C H A T | P V L V I Q D E R L | T Q S M C L V G S T | L R A P H G C H S Q | Y M A N M G S I A S | L A M A V I I N G N | E E D G N N V S G G | R N S M R L W G L V | 400 |
| PHYB_CYP    | L H Y P A T D I P Q | A S R F L F K Q N R | V R M I V D C H A T | P V L V I Q D E R L | T Q S M C L V G S T | L R A P H G C H S Q | Y M A N M G S I A S | L A M A V I I N G N | E E D G N N V S G G | R N S M R L W G L V | 400 |
| PHYB_KM2397 | L H Y P A T D I P Q | A S R F L F K Q N R | V R M I V D C H A T | P V L V I Q D E R L | T Q S M C L V G S T | L R A P H G C H S Q | Y M A N M G S I A S | L A M A V I I N G N | E E D G N N V S G G | R N S M R L W G L V | 400 |
|             |                     |                     | 420                 |                     | 440                 |                     | 460                 |                     | 480                 |                     | 500 |
| PHYB_TUR    | V C H H T S A R C I | P F P L R Y A C E F | L M Q A F L Q L N   | M E L Q L A L Q M S | E K R V L R T Q T L | L C D M L L R D S P | A G I V T Q S P S I | M D L V K C D G A A | F L Y N G K Y Y P L | G V A P S E A Q I K | 500 |
| PHYB_CYP    | V C H H T S A R C I | P F P L R Y A C E F | L M Q A F L Q L N   | M E L Q L A L Q M S | E K R V L R T Q T L | L C D M L L R D S P | A G I V T Q S P S I | M D L V K C D G A A | F L Y N G K Y Y P L | G V A P S E A Q I K | 500 |
| PHYB_KM2397 | V C H H T S A R C I | P F P L R Y A C E F | L M Q A F L Q L N   | M E L Q L A L Q M S | E K R V L R T Q T L | L C D M L L R D S P | A G I V T Q S P S I | M D L V K C D G A A | F L Y N G K Y Y P L | G V A P S E A Q I K | 500 |
|             |                     |                     | 520                 |                     | 540                 |                     | 560                 |                     | 580                 |                     | 600 |
| PHYB_TUR    | D I V E W L L A N H | A D S T G L S T D S | L G D A Y G P G A V | A L G D A V C G M A | V A Y I T K K D F L | F W F R S H T G K E | I K W G G A K H P P | E D K D D G Q R M H | P R S S F K A F L E | V V K S R S Q P W E | 600 |
| PHYB_CYP    | D I V E W L L A N H | A D S T G L S T D S | L G D A Y G P G A V | A L G D A V C G M A | V A Y I T K K D F L | F W F R S H T G K E | I K W G G A K H P P | E D K D D G Q R M H | P R S S F K A F L E | V V K S R S Q P W E | 600 |
| PHYB_KM2397 | D I V E W L L A N H | A D S T G L S T D S | L G D A Y G P G A V | A L G D A V C G M A | V A Y I T K K D F L | F W F R S H T G K E | I K W G G A K H P P | E D K D D G Q R M H | P R S S F K A F L E | V V K S R S Q P W E | 600 |
|             |                     |                     | 620                 |                     | 640                 |                     | 660                 |                     | 680                 |                     | 700 |
| PHYB_TUR    | T A E M D A I H S L | Q L I L R D S F K E | S E A M N A K A A D | G T V Q P V R D G S | E Q G L D E L G A V | A R E M V R L I E T | A T V P I F A V D T | G G C I N G W N A K | I A E L T G L S V E | E A M G K S L V S D | 700 |
| PHYB_CYP    | T A E M D A I H S L | Q L I L R D S F K E | S E A M N A K A A D | G T V Q P V R D G S | E Q G L D E L G A V | A R E M V R L I E T | A T V P I F A V D T | G G C I N G W N A K | I A E L T G L S V E | E A M G K S L V S D | 700 |
| PHYB_KM2397 | T A E M D A I H S L | Q L I L R D S F K E | S E A M N A K A A D | G T V Q P V R D G S | E Q G L D E L G A V | A R E M V R L I E T | A T V P I F A V D T | G G C I N G W N A K | I A E L T G L S V E | E A M G K S L V S D | 700 |
|             |                     |                     | 720                 |                     | 740                 |                     | 760                 |                     | 780                 |                     | 800 |
| PHYB_TUR    | L I Y K E N E E T V | D K L L S R A L K G | D E D K N V E V K L | K T F N P V L Q G K | A V F I V V N A C S | S K D Y L N N I V G | V C F V G Q D V T S | H K I V M D K F I N | I Q G D Y K A I V H | S P N P L I P P I F | 800 |
| PHYB_CYP    | L I Y K E N E E T V | D K L L S R A L K G | D E D K N V E V K L | K T F N P V L Q G K | A V F I V V N A C S | S K D Y L N N I V G | V C F V G Q D V T S | H K I V M D K F I N | I Q G D Y K A I V H | S P N P L I P P I F | 800 |
| PHYB_KM2397 | L I Y K E N E E T V | D K L L S R A L K G | D E D K N V E V K L | K T F N P V L Q G K | A V F I V V N A C S | S K D Y L N N I V G | V C F V G Q D V T S | H K I V M D K F I N | I Q G D Y K A I V H | S P N P L I P P I F | 800 |
|             |                     |                     | 820                 |                     | 840                 |                     | 860                 |                     | 880                 |                     | 900 |
| PHYB_TUR    | A A D G N T         |                     |                     |                     |                     |                     |                     |                     |                     |                     |     |

D

|             |             |            |             |             |             |             |             |             |            |      |       |  |
|-------------|-------------|------------|-------------|-------------|-------------|-------------|-------------|-------------|------------|------|-------|--|
|             |             |            | 20          |             |             | 40          |             |             | 60         |      | 80    |  |
| PHYC_TUR    | MSSSSTERSN  | CSRRSSTRSI | HNSRVTSQIL  | ADAKLHVNFV  | ESERLFDYSA  | SVNLNMSNST  | CNVSSSAVSA  | YLQMIQRGML  | IQPFGLIVV  | 90   |       |  |
| PHYC_CYP    | MSSSSTERSN  | CSRRSSTRSI | HNSRVTSQIL  | ADAKLHVNFV  | ESERLFDYSA  | SVNLNMSNST  | CNVSSSAVSA  | YLQMIQRGML  | IQPFGLIVV  | 90   |       |  |
| PHYC_KM2397 | MSSSSTERSN  | CSRRSSTRSI | HNSRVTSQIL  | ADAKLHVNFV  | ESERLFDYSA  | SVNLNMSNST  | CNVSSSAVSA  | YLQMIQRGML  | IQPFGLIVV  | 90   |       |  |
|             |             | 100        |             |             | 120         |             |             |             | 140        |      | 160   |  |
| PHYC_TUR    | DEKSLKVIAY  | SENTQEMLGL | TPHTVPNLEQ  | KETLTFGTNV  | QSLFLSPGSS  | ALQKAVEFDE  | ISILNPIMLH  | CRSSLKPFYA  | ILHRIEGLV  | 180  |       |  |
| PHYC_CYP    | DEKSLKVIAY  | SENTQEMLGL | TPHTVPNLEQ  | KETLTFGTNV  | QSLFLSPGSS  | ALQKAVEFDE  | ISILNPIMLH  | CRSSLKPFYA  | ILHRIEGLV  | 180  |       |  |
| PHYC_KM2397 | DEKSLKVIAY  | SENTQEMLGL | TPHTVPNLEQ  | KETLTFGTNV  | QSLFLSPGSS  | ALQKAVEFDE  | ISILNPIMLH  | CRSSLKPFYA  | ILHRIEGLV  | 180  |       |  |
|             |             | 200        |             |             | 220         |             |             |             | 240        |      | 260   |  |
| PHYC_TUR    | IDLEPVNPDF  | VPVTAAGALK | SYKLAAKAIS  | RLQALTSGNL  | LLLCDVLVKE  | VSELTGYDRV  | MVYKFHEDGH  | GEVIAENCR   | DVEPYIGLH  | 270  |       |  |
| PHYC_CYP    | IDLEPVNPDF  | VPVTAAGALK | SYKLAAKAIS  | RLQALTSGNL  | LLLCDVLVKE  | VSELTGYDRV  | MVYKFHEDGH  | GEVIAENCR   | DVEPYIGLH  | 270  |       |  |
| PHYC_KM2397 | IDLEPVNPDF  | VPVTAAGALK | SYKLAAKAIS  | RLQALTSGNL  | LLLCDVLVKE  | VSELTGYDRV  | MVYKFHEDGH  | GEVIAENCR   | DVEPYIGLH  | 270  |       |  |
|             |             | 280        |             |             | 300         |             |             |             | 320        |      | 340   |  |
| PHYC_TUR    | SATDIPQASR  | FLFMRNKVRM | ICDCSAPV IK | VVQDKLSQSP  | ISLSGSTLRA  | PQACHAQYMS  | NMGVSAVLVM  | SVT INGDDNY | EMNRDPHTGR | 360  |       |  |
| PHYC_CYP    | SATDIPQASR  | FLFMRNKVRM | ICDCSAPV IK | VVQDKLSQSP  | ISLSGSTLRA  | PQACHAQYMS  | NMGVSAVLVM  | SVT INGDDNY | EMNRDPHTGR | 360  |       |  |
| PHYC_KM2397 | SATDIPQASR  | FLFMRNKVRM | ICDCSAPV IK | VVQDKLSQSP  | ISLSGSTLRA  | PQACHAQYMS  | NMGVSAVLVM  | SVT INGDDNY | EMNRDPHTGR | 360  |       |  |
|             |             | 360        |             |             | 400         |             |             |             | 420        |      | 440   |  |
| PHYC_TUR    | RLWGLVVCCH  | SNPRFVSFFL | RYACELLMQV  | FTAQINKEVE  | SALLVKEKHI  | LQTQSVLCDM  | FFRNAPIGIV  | TESPNIMDLV  | KCDGAALCYR | 450  |       |  |
| PHYC_CYP    | RLWGLVVCCH  | SNPRFVSFFL | RYACELLMQV  | FTAQINKEVE  | SALLVKEKHI  | LQTQSVLCDM  | FFRNAPIGIV  | TESPNIMDLV  | KCDGAALCYR | 450  |       |  |
| PHYC_KM2397 | RLWGLVVCCH  | SNPRFVSFFL | RYACELLMQV  | FTAQINKEVE  | SALLVKEKHI  | LQTQSVLCDM  | FFRNAPIGIV  | TESPNIMDLV  | KCDGAALCYR | 450  |       |  |
|             |             | 480        |             |             | 500         |             |             |             | 520        |      | 540   |  |
| PHYC_TUR    | DKFWLLGITP  | TEIQVRDID  | WVWLNKEGKT  | GFTTESLMES  | GYPGASGLGE  | SVCGMAVVF I | SEKDFLFWFR  | SGTAKQIKWG  | GARHDPNDRD | 540  |       |  |
| PHYC_CYP    | DKFWLLGITP  | TEIQVRDID  | WVWLNKEGKT  | GFTTESLMES  | GYPGASGLGE  | SVCGMAVVF I | SEKDFLFWFR  | SGTAKQIKWG  | GARHDPNDRD | 540  |       |  |
| PHYC_KM2397 | DKFWLLGITP  | TEIQVRDID  | WVWLNKEGKT  | GFTTESLMES  | GYPGASGLGE  | SVCGMAVVF I | SEKDFLFWFR  | SGTAKQIKWG  | GARHDPNDRD | 540  |       |  |
|             |             | 560        |             |             | 580         |             |             |             | 600        |      | 620   |  |
| PHYC_TUR    | GKRMHPRSSF  | KAFMEVIRWK | SEAWDVMEMD  | AINSLQLI IK | GSLQEHSKTD  | VNVPSMDNRV  | QKVDELVCVIL | NEMVRLIDTA  | AVPIFAVDAS | 630  |       |  |
| PHYC_CYP    | GKRMHPRSSF  | KAFMEVIRWK | SEAWDVMEMD  | AINSLQLI IK | GSLQEHSKTD  | VNVPSMDNRV  | QKVDELVCVIL | NEMVRLIDTA  | AVPIFAVDAS | 630  |       |  |
| PHYC_KM2397 | GKRMHPRSSF  | KAFMEVIRWK | SEAWDVMEMD  | AINSLQLI IK | GSLQEHSKTD  | VNVPSMDNRV  | QKVDELVCVIL | NEMVRLIDTA  | AVPIFAVDAS | 630  |       |  |
|             |             | 640        |             |             | 660         |             |             |             | 680        |      | 700   |  |
| PHYC_TUR    | GVINGWNSKA  | AEVTLGAVEQ | AIGKSLSDLV  | EEDSVTTVNN  | ILNLALQGSE  | ERGAEIKIKS  | FGPKRKSPP I | DLVINTCCSR  | DTMRNLVGCV | 720  |       |  |
| PHYC_CYP    | GVINGWNSKA  | AEVTLGAVEQ | AIGKSLSDLV  | EEDSVTTVNN  | ILNLALQGSE  | ERGAEIKIKS  | FGPKRKSPP I | DLVINTCCSR  | DTMRNLVGCV | 720  |       |  |
| PHYC_KM2397 | GVINGWNSKA  | AEVTLGAVEQ | AIGKSLSDLV  | EEDSVTTVNN  | ILNLALQGSE  | ERGAEIKIKS  | FGPKRKSPP I | DLVINTCCSR  | DTMRNLVGCV | 720  |       |  |
|             |             | 740        |             |             | 760         |             |             |             | 780        |      | 800   |  |
| PHYC_TUR    | FIGQDVTGQK  | KLFESYSRVR | EDYARIMWKP  | STLIPPIFMT  | NPNGVCTEWN  | DAMQKLSGIK  | REEAVEKLLL  | GEVFTLDDYG  | CRDKHDHTLV | 810  |       |  |
| PHYC_CYP    | FIGQDVTGQK  | KLFESYSRVR | EDYARIMWKP  | STLIPPIFMT  | NPNGVCTEWN  | DAMQKLSGIK  | REEAVEKLLL  | GEVFTLDDYG  | CRDKHDHTLV | 810  |       |  |
| PHYC_KM2397 | FIGQDVTGQK  | KLFESYSRVR | EDYARIMWKP  | STLIPPIFMT  | NPNGVCTEWN  | DAMQKLSGIK  | REEAVEKLLL  | GEVFTLDDYG  | CRDKHDHTLV | 810  |       |  |
|             |             | 820        |             |             | 840         |             |             |             | 860        |      | 880   |  |
| PHYC_TUR    | KLRIALNAVS  | SGENVEKLF  | GFYHREGNFV  | EALLSTNKKT  | DIEGKVTGVL  | CFLQVPSPEL  | QCALQVQVQIS | EKAMACALDK  | LAYLRQVMN  | 900  |       |  |
| PHYC_CYP    | KLRIALNAVS  | SGENVEKLF  | GFYHREGNFV  | EALLSTNKKT  | DIEGKVTGVL  | CFLQVPSPEL  | QCALQVQVQIS | EKAMACALDK  | LAYLRQVMN  | 900  |       |  |
| PHYC_KM2397 | KLRIALNAVS  | SGENVEKLF  | GFYHREGNFV  | EALLSTNKKT  | DIEGKVTGVL  | CFLQVPSPEL  | QCALQVQVQIS | EKAMACALDK  | LAYLRQVMN  | 900  |       |  |
|             |             | 920        |             |             | 940         |             |             |             | 960        |      | 980   |  |
| PHYC_TUR    | PENAI AFLQN | LLHSSGLSDE | QKWLRLTNIL  | CREQLAKVIS  | DSDLLEGIEEG | YGELSLNEFS  | LEESLEAVVK  | QVMLESDEK   | VQILCDYPFE | 990  |       |  |
| PHYC_CYP    | PENAI AFLQN | LLHSSGLSDE | QKWLRLTNIL  | CREQLAKVIS  | DSDLLEGIEEG | YGELSLNEFS  | LEESLEAVVK  | QVMLESDEK   | VQILCDYPFE | 990  |       |  |
| PHYC_KM2397 | PENAI AFLQN | LLHSSGLSDE | QKWLRLTNIL  | CREQLAKVIS  | DSDLLEGIEEG | YGELSLNEFS  | LEESLEAVVK  | QVMLESDEK   | VQILCDYPFE | 990  |       |  |
|             |             | 1,000      |             |             | 1,020       |             |             |             | 1,040      |      | 1,060 |  |
| PHYC_TUR    | VSSIRLYGDI  | LRLQQLISET | LSCSLSFTPA  | FKGLSVSFKV  | IARVEAIGRR  | TKRVHLEFRI  | IHPAPGLPGD  | LENEMFKPLR  | KGTSREGLGL | 1080 |       |  |
| PHYC_CYP    | VSSIRLYGDI  | LRLQQLISET | LSCSLSFTPA  | FKGLSVSFKV  | IARVEAIGRR  | TKRVHLEFRI  | IHPAPGLPGD  | LENEMFKPLR  | KGTSREGLGL | 1080 |       |  |
| PHYC_KM2397 | VSSIRLYGDI  | LRLQQLISET | LSCSLSFTPA  | FKGLSVSFKV  | IARVEAIGRR  | TKRVHLEFRI  | IHPAPGLPGD  | LENEMFKPLR  | KGTSREGLGL | 1080 |       |  |
|             |             | 1,100      |             |             | 1,120       |             |             |             | 1,140      |      | 1,160 |  |
| PHYC_TUR    | HMTEKLVKLM  | EKGRMRYLRE | SDISVVFILA  | EFPLI 1115  |             |             |             |             |            |      |       |  |
| PHYC_CYP    | HMTEKLVKLM  | EKGRMRYLRE | SDISVVFILA  | EFPLI 1115  |             |             |             |             |            |      |       |  |
| PHYC_KM2397 | HMTEKLVKLM  | EKGRMRYLRE | SDISVVFILA  | EFPLI 1115  |             |             |             |             |            |      |       |  |

E

|             |             |             |             |            |             |             |             |             |              |     |       |  |
|-------------|-------------|-------------|-------------|------------|-------------|-------------|-------------|-------------|--------------|-----|-------|--|
|             |             |             | 20          |            |             | 40          |             |             | 60           |     | 80    |  |
| PHYD_TUR    | MVSGGGGEGS  | GSGGNRGGKA  | ASSGLRVAES  | NHTNSHRGEO | AQSSATKALR  | SQNSQSNHTD  | SKSKAIQOYT  | VDARLHAVFE  | QSGESGKSF    | 90  |       |  |
| PHYD_CYP    | MVSGGGGEGS  | GSGGNRGGKA  | ASSGLRVAES  | NHTNSHRGEO | AQSSATKALR  | SQNSQSNHTD  | SKSKAIQOYT  | VDARLHAVFE  | QSGESGKSF    | 90  |       |  |
| PHYD_KM2397 | MVSGGGGEGS  | GSGGNRGGKA  | ASSGLRVAES  | NHTNSHRGEO | AQSSATKALR  | SQNSQSNHTD  | SKSKAIQOYT  | VDARLHAVFE  | QSGESGKSF    | 90  |       |  |
|             |             | 100         |             |            | 120         |             |             |             | 140          |     | 160   |  |
| PHYD_TUR    | YSNSLKTITN  | WSSVPEQOIT  | AYLSRIQRGG  | YIQPFGLCIA | VDESTFNIIG  | YSENAREMLG  | LMLOSVPVIE  | NSEVLSIGTD  | LRSLFKPSI    | 180 |       |  |
| PHYD_CYP    | YSNSLKTITN  | WSSVPEQOIT  | AYLSRIQRGG  | YIQPFGLCIA | VDESTFNIIG  | YSENAREMLG  | LMLOSVPVIE  | NSEVLSIGTD  | LRSLFKPSI    | 180 |       |  |
| PHYD_KM2397 | YSNSLKTITN  | WSSVPEQOIT  | AYLSRIQRGG  | YIQPFGLCIA | VDESTFNIIG  | YSENAREMLG  | LMLOSVPVIE  | NSEVLSIGTD  | LRSLFKPSI    | 180 |       |  |
|             |             | 200         |             |            | 220         |             |             |             | 240          |     | 260   |  |
| PHYD_TUR    | ILLERAFVAR  | EITLLNPVWI  | HSKNTGKPFY  | AILHRVDVGI | VIDLEPARTE  | DPALS IAGAV | QSQKLAVRAI  | SHLQSLPGGD  | IKLLCDTVVE   | 270 |       |  |
| PHYD_CYP    | ILLERAFVAR  | EITLLNPVWI  | HSKNTGKPFY  | AILHRVDVGI | VIDLEPARTE  | DPALS IAGAV | QSQKLAVRAI  | SHLQSLPGGD  | IKLLCDTVVE   | 270 |       |  |
| PHYD_KM2397 | ILLERAFVAR  | EITLLNPVWI  | HSKNTGKPFY  | AILHRVDVGI | VIDLEPARTE  | DPALS IAGAV | QSQKLAVRAI  | SHLQSLPGGD  | IKLLCDTVVE   | 270 |       |  |
|             |             | 280         |             |            | 300         |             |             |             | 320          |     | 340   |  |
| PHYD_TUR    | RVRDLTGDR   | VMVYKFHEDE  | HGEVVAETKR  | DDLEPYFGLH | YPATDIPQAS  | RFLFKQNRVR  | MI VDOCHATV | RVVQDDRLTQ  | SICLVGSTLR   | 360 |       |  |
| PHYD_CYP    | RVRDLTGDR   | VMVYKFHEDE  | HGEVVAETKR  | DDLEPYFGLH | YPATDIPQAS  | RFLFKQNRVR  | MI VDOCHATV | RVVQDDRLTQ  | SICLVGSTLR   | 360 |       |  |
| PHYD_KM2397 | RVRDLTGDR   | VMVYKFHEDE  | HGEVVAETKR  | DDLEPYFGLH | YPATDIPQAS  | RFLFKQNRVR  | MI VDOCHATV | RVVQDDRLTQ  | SICLVGSTLR   | 360 |       |  |
|             |             | 380         |             |            | 400         |             |             |             | 420          |     | 440   |  |
| PHYD_TUR    | APHGCHAQYM  | ANMGSIASLA  | MAVI INGNEE | DNGVGTGRNR | SMRLWGLVVC  | HHTSARCIPF  | PLRYACEFLM  | QAFGLQLNME  | LQLALQVSK    | 450 |       |  |
| PHYD_CYP    | APHGCHAQYM  | ANMGSIASLA  | MAVI INGNEE | DNGVGTGRNR | SMRLWGLVVC  | HHTSARCIPF  | PLRYACEFLM  | QAFGLQLNME  | LQLALQVSK    | 450 |       |  |
| PHYD_KM2397 | APHGCHAQYM  | ANMGSIASLA  | MAVI INGNEE | DNGVGTGRNR | SMRLWGLVVC  | HHTSARCIPF  | PLRYACEFLM  | QAFGLQLNME  | LQLALQVSK    | 450 |       |  |
|             |             | 460         |             |            | 480         |             |             |             | 500          |     | 520   |  |
| PHYD_TUR    | RVLRMQTLIC  | DMLLRDSPAG  | IVTQSPS IMD | LVKCNAAFL  | YQGKYSLGV   | APSEAQILDI  | VEWLLANHAD  | STGLSTDSL   | DAGYPRASAL   | 540 |       |  |
| PHYD_CYP    | RVLRMQTLIC  | DMLLRDSPAG  | IVTQSPS IMD | LVKCNAAFL  | YQGKYSLGV   | APSEAQILDI  | VEWLLANHAD  | STGLSTDSL   | DAGYPRASAL   | 540 |       |  |
| PHYD_KM2397 | RVLRMQTLIC  | DMLLRDSPAG  | IVTQSPS IMD | LVKCNAAFL  | YQGKYSLGV   | APSEAQILDI  | VEWLLANHAD  | STGLSTDSL   | DAGYPRASAL   | 540 |       |  |
|             |             | 560         |             |            | 580         |             |             |             | 600          |     | 620   |  |
| PHYD_TUR    | GDAVCGMAVA  | YITKDDFLWF  | FRSHTEKEIK  | WGGAKHPED  | KDDGORMHPR  | SSFKAFLEVV  | KSRQCPWEPA  | EMDAIHSLLQ  | ILRDSFKSE    | 630 |       |  |
| PHYD_CYP    | GDAVCGMAVA  | YITKDDFLWF  | FRSHTEKEIK  | WGGAKHPED  | KDDGORMHPR  | SSFKAFLEVV  | KSRQCPWEPA  | EMDAIHSLLQ  | ILRDSFKSE    | 630 |       |  |
| PHYD_KM2397 | GDAVCGMAVA  | YITKDDFLWF  | FRSHTEKEIK  | WGGAKHPED  | KDDGORMHPR  | SSFKAFLEVV  | KSRQCPWEPA  | EMDAIHSLLQ  | ILRDSFKSE    | 630 |       |  |
|             |             | 640         |             |            | 660         |             |             |             | 680          |     | 700   |  |
| PHYD_TUR    | AINNSKAVAG  | AVQPLGDI AE | QEIDELGSA   | REMVRLIETA | TVP IFAVDVD | GCINGWNAKI  | AELTGLSVEE  | AMGRSLVHDL  | IYKEEETVD    | 720 |       |  |
| PHYD_CYP    | AINNSKAVAG  | AVQPLGDI AE | QEIDELGSA   | REMVRLIETA | TVP IFAVDVD | GCINGWNAKI  | AELTGLSVEE  | AMGRSLVHDL  | IYKEEETVD    | 720 |       |  |
| PHYD_KM2397 | AINNSKAVAG  | AVQPLGDI AE | QEIDELGSA   | REMVRLIETA | TVP IFAVDVD | GCINGWNAKI  | AELTGLSVEE  | AMGRSLVHDL  | IYKEEETVD    | 720 |       |  |
|             |             | 740         |             |            | 760         |             |             |             | 780          |     | 800   |  |
| PHYD_TUR    | KLLSCALKGD  | EGKNVELKIK  | TFGPQLGKA   | VFVVNACSS  | KDYLDNI VGV | CFI AQDVTGH | KTVMDKFINI  | GGDYKAI IHS | PNPLIPPIFA   | 810 |       |  |
| PHYD_CYP    | KLLSCALKGD  | EGKNVELKIK  | TFGPQLGKA   | VFVVNACSS  | KDYLDNI VGV | CFI AQDVTGH | KTVMDKFINI  | GGDYKAI IHS | PNPLIPPIFA   | 810 |       |  |
| PHYD_KM2397 | KLLSCALKGD  | EGKNVELKIK  | TFGPQLGKA   | VFVVNACSS  | KDYLDNI VGV | CFI AQDVTGH | KTVMDKFINI  | GGDYKAI IHS | PNPLIPPIFA   | 810 |       |  |
|             |             | 820         |             |            | 840         |             |             |             | 860          |     | 880   |  |
| PHYD_TUR    | ADENTCCMEW  | NTAMEKLTGW  | PRNEVIGKML  | VREVFSGCCR | LKGPDALTKF  | MI VLNHMVGG | QETDKFPFPF  | FDRRGKFIQT  | LLTLNKRVLN   | 900 |       |  |
| PHYD_CYP    | ADENTCCMEW  | NTAMEKLTGW  | PRNEVIGKML  | VREVFSGCCR | LKGPDALTKF  | MI VLNHMVGG | QETDKFPFPF  | FDRRGKFIQT  | LLTLNKRVLN   | 900 |       |  |
| PHYD_KM2397 | ADENTCCMEW  | NTAMEKLTGW  | PRNEVIGKML  | VREVFSGCCR | LKGPDALTKF  | MI VLNHMVGG | QETDKFPFPF  | FDRRGKFIQT  | LLTLNKRVLN   | 900 |       |  |
|             |             | 920         |             |            | 940         |             |             |             | 960          |     | 980   |  |
| PHYD_TUR    | DGKVI GAFCF | LQIPSPELQQ  | ALEIQRROEA  | ECFSRGKELA | YIFQVIKNPL  | SGLRFTHSM   | EATNLNEEQK  | QLLETGVSC   | MOISKI V EYM | 990 |       |  |
| PHYD_CYP    | DGKVI GAFCF | LQIPSPELQQ  | ALEIQRROEA  | ECFSRGKELA | YIFQVIKNPL  | SGLRFTHSM   | EATNLNEEQK  | QLLETGVSC   | MOISKI V EYM | 990 |       |  |
| PHYD_KM2397 | DGKVI GAFCF | LQIPSPELQQ  | ALEIQRROEA  | ECFSRGKELA | YIFQVIKNPL  | SGLRFTHSM   | EATNLNEEQK  | QLLETGVSC   | MOISKI V EYM | 990 |       |  |
|             |             | 1,000       |             |            | 1,020       |             |             |             | 1,040        |     | 1,060 |  |
| PHYD_TUR    | DVKSIEDGSF  | KLERTEFLLG  | NVINAVVSQV  | MLVLTRELQ  | LIRDPIEIK   |             |             |             |              |     |       |  |



|             |            |            |             |            |            |             |            |            |            |       |
|-------------|------------|------------|-------------|------------|------------|-------------|------------|------------|------------|-------|
|             |            |            | 20          |            | 40         |             | 60         |            | 80         |       |
| PHYE_TUR    | MGFETSSSSA | SNMKPLTDSK | PKSNTAQYSA  | DAGLFADFQQ | SIYTGKSFNY | SKSMISQPIG  | VTDDHITAYL | GNIQRGGFVQ | PFGCLLAVEE | 90    |
| PHYE_CYP    | MGFETSSSSA | SNMKPLTDSK | PKSNTAQYSA  | DAGLFADFQQ | SIYTGKSFNY | SKSMISQPIG  | VTDDHITAYL | GNIQRGGFVQ | PFGCLLAVEE | 90    |
| PHYE_KM2397 | MGFETSSSSA | SNMKPLTDSK | PKSNTAQYSA  | DAGLFADFQQ | SIYTGKSFNY | SKSMISQPIG  | VTDDHITAYL | GNIQRGGFVQ | PFGCLLAVEE | 90    |
|             |            | 100        |             | 120        |            | 140         |            | 160        |            | 180   |
| PHYE_TUR    | SSFCVVGYS  | NCIELLGLCV | ASSSHCNGFE  | GKGLIGIDAR | TFFTPSSSDS | LAKASSFTEI  | SLLNPVLVHS | KTTQKPFYAI | LHRIDAGLVI | 180   |
| PHYE_CYP    | SSFCVVGYS  | NCIELLGLCV | ASSSHCNGFE  | GKGLIGIDAR | TFFTPSSSDS | LAKASSFTEI  | SLLNPVLVHS | KTTQKPFYAI | LHRIDAGLVI | 180   |
| PHYE_KM2397 | SSFCVVGYS  | NCIELLGLCV | ASSSHCNGFE  | GKGLIGIDAR | TFFTPSSSDS | LAKASSFTEI  | SLLNPVLVHS | KTTQKPFYAI | LHRIDAGLVI | 180   |
|             |            | 200        |             | 220        |            | 240         |            | 260        |            | 280   |
| PHYE_TUR    | DLEPTRSGDP | AMTLAGAVQS | QKLAVRAISR  | LQSLPGGDIG | ALCDTVVEDV | QKLTGYDRVM  | VYQFHEDDHG | EVVSEIRRS  | LEPYLGLHYP | 270   |
| PHYE_CYP    | DLEPTRSGDP | AMTLAGAVQS | QKLAVRAISR  | LQSLPGGDIG | ALCDTVVEDV | QKLTGYDRVM  | VYQFHEDDHG | EVVSEIRRS  | LEPYLGLHYP | 270   |
| PHYE_KM2397 | DLEPTRSGDP | AMTLAGAVQS | QKLAVRAISR  | LQSLPGGDIG | ALCDTVVEDV | QKLTGYDRVM  | VYQFHEDDHG | EVVSEIRRS  | LEPYLGLHYP | 270   |
|             |            | 300        |             | 320        |            | 340         |            | 360        |            | 380   |
| PHYE_TUR    | ATDIPQAARF | LFKQNRVRMI | CDCNATPVKV  | IQSDELKRPL | CLVNSTLRSP | HACHTQYMAN  | MGSIASLVLA | IVIKTKDSSK | LWGLVVGHH  | 360   |
| PHYE_CYP    | ATDIPQAARF | LFKQNRVRMI | CDCNATPVKV  | IQSDELKRPL | CLVNSTLRSP | HACHTQYMAN  | MGSIASLVLA | IVIKTKDSSK | LWGLVVGHH  | 360   |
| PHYE_KM2397 | ATDIPQAARF | LFKQNRVRMI | CDCNATPVKV  | IQSDELKRPL | CLVNSTLRSP | HACHTQYMAN  | MGSIASLVLA | IVIKTKDSSK | LWGLVVGHH  | 360   |
|             |            | 380        |             | 400        |            | 420         |            | 440        |            | 460   |
| PHYE_TUR    | SPRYVSFPLR | YACEFLMQAF | GLQLHMLQL   | TSQLAEKKAM | RTQTLLCDML | LRDVTSAIVT  | QSPGIMDLVK | CDGAALYYNG | RCWLGVGTPN | 450   |
| PHYE_CYP    | SPRYVSFPLR | YACEFLMQAF | GLQLHMLQL   | TSQLAEKKAM | RTQTLLCDML | LRDVTSAIVT  | QSPGIMDLVK | CDGAALYYNG | RCWLGVGTPN | 450   |
| PHYE_KM2397 | SPRYVSFPLR | YACEFLMQAF | GLQLHMLQL   | TSQLAEKKAM | RTQTLLCDML | LRDVTSAIVT  | QSPGIMDLVK | CDGAALYYNG | RCWLGVGTPN | 450   |
|             |            | 460        |             | 480        |            | 500         |            | 520        |            | 540   |
| PHYE_TUR    | ESQVKDLVKW | LIENHGDSTG | LTTDSLVDAG  | YPDASLFGDA | VCGIAAAGIS | SKDFLIWFRS  | NTASAIKWGG | AKHHPKDKDD | DERMHPRSSF | 540   |
| PHYE_CYP    | ESQVKDLVKW | LIENHGDSTG | LTTDSLVDAG  | YPDASLFGDA | VCGIAAAGIS | SKDFLIWFRS  | NTASAIKWGG | AKHHPKDKDD | DERMHPRSSF | 540   |
| PHYE_KM2397 | ESQVKDLVKW | LIENHGDSTG | LTTDSLVDAG  | YPDASLFGDA | VCGIAAAGIS | SKDFLIWFRS  | NTASAIKWGG | AKHHPKDKDD | DERMHPRSSF | 540   |
|             |            | 560        |             | 580        |            | 600         |            | 620        |            | 640   |
| PHYE_TUR    | KAFLEVVKCR | SLPWEVSEIN | AIHSLQLIMR  | ESFHNMQETS | SKAVSSNVMA | KDANELTSFV  | CEMVRMIETA | TAPIFGVDSL | GCINGWNKKI | 630   |
| PHYE_CYP    | KAFLEVVKCR | SLPWEVSEIN | AIHSLQLIMR  | ESFHNMQETS | SKAVSSNVMA | KDANELTSFV  | CEMVRMIETA | TAPIFGVDSL | GCINGWNKKI | 630   |
| PHYE_KM2397 | KAFLEVVKCR | SLPWEVSEIN | AIHSLQLIMR  | ESFHNMQETS | SKAVSSNVMA | KDANELTSFV  | CEMVRMIETA | TAPIFGVDSL | GCINGWNKKI | 630   |
|             |            | 640        |             | 660        |            | 680         |            | 700        |            | 720   |
| PHYE_TUR    | AEITGLQASE | AMGKSLINDI | VQGESRADLE  | SLLSKALQGE | EENKVMKLKR | KFGQSNLDS   | SSGAAAACV  | IVNACTSRDS | AGKII GVCV | 720   |
| PHYE_CYP    | AEITGLQASE | AMGKSLINDI | VQGESRADLE  | SLLSKALQGE | EENKVMKLKR | KFGQSNLDS   | SSGAAAACV  | IVNACTSRDS | AGKII GVCV | 720   |
| PHYE_KM2397 | AEITGLQASE | AMGKSLINDI | VQGESRADLE  | SLLSKALQGE | EENKVMKLKR | KFGQSNLDS   | SSGAAAACV  | IVNACTSRDS | AGKII GVCV | 720   |
|             |            | 740        |             | 760        |            | 780         |            | 800        |            | 820   |
| PHYE_TUR    | QDITGEKAI  | TDRFIRLQGD | YKTI VQSLNP | LIPPIFASDQ | NACCSEWNA  | MEKLTGWSKH  | EVIKMLPGE  | VFGVLCKVKC | QDSLTKFLSI | 810   |
| PHYE_CYP    | QDITGEKAI  | TDRFIRLQGD | YKTI VQSLNP | LIPPIFASDQ | NACCSEWNA  | MEKLTGWSKH  | EVIKMLPGE  | VFGVLCKVKC | QDSLTKFLSI | 810   |
| PHYE_KM2397 | QDITGEKAI  | TDRFIRLQGD | YKTI VQSLNP | LIPPIFASDQ | NACCSEWNA  | MEKLTGWSKH  | EVIKMLPGE  | VFGVLCKVKC | QDSLTKFLSI | 810   |
|             |            | 820        |             | 840        |            | 860         |            | 880        |            | 900   |
| PHYE_TUR    | LYQISGQIS  | ESSLFGFFNR | EGNYIESSLT  | ANKSTNSEGK | VVGCFFFLQI | IKKESCISTR  | SNLNLTYIRQ | EIKNPLNGIR | FAHKLESSE  | 900   |
| PHYE_CYP    | LYQISGQIS  | ESSLFGFFNR | EGNYIESSLT  | ANKSTNSEGK | VVGCFFFLQI | IKKESCISTR  | SNLNLTYIRQ | EIKNPLNGIR | FAHKLESSE  | 900   |
| PHYE_KM2397 | LYQISGQIS  | ESSLFGFFNR | EGNYIESSLT  | ANKSTNSEGK | VVGCFFFLQI | IKKESCISTR  | SNLNLTYIRQ | EIKNPLNGIR | FAHKLESSE  | 900   |
|             |            | 920        |             | 940        |            | 960         |            | 980        |            | 1,000 |
| PHYE_TUR    | ISESQROFLK | TSDACEKQIT | TIIDGMDLKS  | IEEGKSELKT | EEFHLGSILD | AII SQVMIML | RERHSQKLE  | IPEEIKNLSL | FGDGVRLQLI | 990   |
| PHYE_CYP    | ISESQROFLK | TSDACEKQIT | TIIDGMDLKS  | IEEGKSELKT | EEFHLGSILD | AII SQVMIML | RERHSQKLE  | IPEEIKNLSL | FGDGVRLQLI | 990   |
| PHYE_KM2397 | ISESQROFLK | TSDACEKQIT | TIIDGMDLKS  | IEEGKSELKT | EEFHLGSILD | AII SQVMIML | RERHSQKLE  | IPEEIKNLSL | FGDGVRLQLI | 990   |
|             |            | 1,000      |             | 1,020      |            | 1,040       |            | 1,060      |            | 1,080 |
| PHYE_TUR    | LADLLRNIVN | HSPFPNSWIG | IKISGSKNLD  | DCCIHLOFRI | IHPGKGLPLE | IVNDMFGIED  | GWVTPDGLGL | KLSRKLLEQM | KGSVSVYRED | 1080  |
| PHYE_CYP    | LADLLRNIVN | HSPFPNSWIG | IKISGSKNLD  | DCCIHLOFRI | IHPGKGLPLE | IVNDMFGIED  | GWVTPDGLGL | KLSRKLLEQM | KGSVSVYRED | 1080  |
| PHYE_KM2397 | LADLLRNIVN | HSPFPNSWIG | IKISGSKNLD  | DCCIHLOFRI | IHPGKGLPLE | IVNDMFGIED  | GWVTPDGLGL | KLSRKLLEQM | KGSVSVYRED | 1080  |
|             |            | 1,100      |             | 1,120      |            | 1,140       |            | 1,160      |            | 1,180 |
| PHYE_TUR    | DCCFFHVDLQ | LRTKTSDETR | GVETKSQKFF  |            |            |             |            |            |            | 1110  |
| PHYE_CYP    | DCCFFHVDLQ | LRTKTSDETR | GVETKSQKFF  |            |            |             |            |            |            | 1110  |
| PHYE_KM2397 | DCCFFHVDLQ | LRTKTSDETR | GVETKSQKFF  |            |            |             |            |            |            | 1110  |

**Supporting Figure 5.** Identification and alignments of phytochromes in *Ae. arabicum*. (a) Phylogenetic tree of phytochromes using Bayesian inference (1688500 generations, standard deviation of split frequencies 0.009992) and allows clear assignment of *Ae. arabicum* orthologues. Sequences of *A. thaliana* (ARATH) and *Ae. arabicum* (AETAR) are marked in green and red, respectively. For detailed assignment of five letter code see Supplemental Dataset 7. (b-f) Phytochrome protein alignments of three *Ae. arabicum* accessions. Germination of TUR seeds is light-insensitive while CYP and KM2397 both have light inhibited germination.

|                  |             |            |    |             |    |            |           |            |             |            |            |           |      |            |     |         |      |     |  |
|------------------|-------------|------------|----|-------------|----|------------|-----------|------------|-------------|------------|------------|-----------|------|------------|-----|---------|------|-----|--|
|                  |             |            | 20 |             | 40 |            | 60        |            | 80          |            |            |           |      |            |     |         |      |     |  |
| PIL5/PIF1_TUR    | MNHFVPDFE I | DDDYTNP I  | SS | SLNLRPKP I  | IM | AENEDDLME  | LLWHNGQLF | IQEDEMSSWL | HYP LREDDFC | SDLFNSVSST | SQPQHVSTAP | 90        |      |            |     |         |      |     |  |
| PIL5/PIF1_KM2397 | MNHFVPDFE I | DDDYTNP I  | SS | SLNLRPKP I  | IM | AENEDDLME  | LLWHNGQLF | IQEDEMSSWL | HYP LREDDFC | SDLFNSVSST | SQPQHVSTAP | 90        |      |            |     |         |      |     |  |
| PIL5/PIF1_CYP    | MNHFVPDFE I | DDDYTNP I  | SS | SLNLRPKP I  | IM | AENEDDLME  | LLWHNGQLF | IQEDEMSSWL | HYP LREDDFC | SDLFNSVSST | SQPQHVSTAP | 90        |      |            |     |         |      |     |  |
|                  | 100         |            |    | 120         |    | 140        |           | 160        |             | 180        |            |           |      |            |     |         |      |     |  |
| PIL5/PIF1_TUR    | NVSTAPNVS N | VSTAPNVSTA |    | PNVFTAPNVS  | I  | IATNVSNQTS | Q         | ITS AKPLVR | N           | FINFSRFRG  | N          | FTGDKIESG | PS I | SKS I      | VRE | STQVNP  | SESD | 180 |  |
| PIL5/PIF1_KM2397 | NVSTAPNVS X | VSTAPNVSTA |    | PNVFTAPNVS  | I  | IATNVSNQTS | Q         | ITS AKPLVR | N           | FINFSRFRG  | N          | FTGDKIESG | PS I | SKS I      | VRE | STQVNP  | SESD | 180 |  |
| PIL5/PIF1_CYP    | NVSTAPNVS N | VSTAPNVSTA |    | PNVFTAPNVS  | I  | IATNVSNQTS | Q         | ITS AKP VR | N           | FINFSRFRG  | N          | FTGDKIESG | PS I | SKS I      | VRE | STQVNP  | SESD | 180 |  |
|                  | 200         |            |    | 220         |    | 240        |           | 260        |             | 280        |            |           |      |            |     |         |      |     |  |
| PIL5/PIF1_TUR    | LTRVDVNRET  | VNCGSSSDVA |    | GENAFNF AIN | R  | KGKAVATAN  | P         | TAATAGE IS | G           | ASSSV ISKA | D          | IEPIYLEPA | T    | TATATVNEKK | R   | KEKEA I | DET  | 270 |  |
| PIL5/PIF1_KM2397 | LTRVDVNRET  | VNCGSSSDVA |    | GENAFNF AIN | R  | KGKAVATAN  | P         | TAATAGE IS | G           | ASSSV ISKA | D          | IEPIYLEPA | T    | TATATVNEKK | R   | KEKEA I | DET  | 270 |  |
| PIL5/PIF1_CYP    | LTRVDVNRET  | VNCGSSSDVA |    | GENAFNF AIN | R  | KGKAVATAN  | P         | TAATAGE IS | G           | ASSSV ISKA | D          | IEPIYLEPA | T    | TAT VNEKK  | R   | KEKEA I | DET  | 268 |  |
|                  | 280         |            |    | 300         |    | 320        |           | 340        |             |            |            |           |      |            |     |         |      |     |  |
| PIL5/PIF1_TUR    | ESRSEETRAG  | RGSTSTKRSR |    | AAEVHNLSE R | K  | RDRINERM   | K         | ALQEL IPRC | N           | KSDKASMLD  | E          | AIEYMKSLQ | L    | QIQVFT     |     |         |      | 347 |  |
| PIL5/PIF1_KM2397 | ESRSEETRAG  | RGSTSTKRSR |    | AAEVHNLSE R | K  | RDRINERM   | K         | ALQEL IPRC | N           | KSDKASMLD  | E          | AIEYMKSLQ | L    | QIQVFT     |     |         |      | 347 |  |
| PIL5/PIF1_CYP    | ESRSEETRAG  | RGSTSTKRSR |    | AAEVHNLSE R | K  | RDRINERM   | K         | ALQEL IPRC | N           | KSDKASMLD  | E          | AIEYMKSLQ | L    | QIQ LFT    |     |         |      | 345 |  |

**Supporting Figure 6.** Alignment of PIL5/PIF1 protein sequence of three *Ae. arabicum* accessions. Germination of TUR seeds is light-insensitive while CYP and KM2397 both have light inhibited germination.
