# Supplementary material for: Aethionema arabicum: a novel model plant to study the light control of seed germination
Source: PubMed Central journal article supplement — J Exp Bot. 2019 Apr 5;70(12):3313–28. doi: 10.1093/jxb/erz146 (PMC6598081; doi:10.1093/jxb/erz146), 2019-04-05
Supplement: erz146_suppl_supplementary_tables_s1-s3.pdf [file erz146_suppl_supplementary_tables_s1-s3.pdf]

## **Journal of Experimental Botany Supplementary Information**

Article title: *Aethionema arabicum*: a novel model plant to study the light control of seed germination

Authors: Zsuzsanna Mérai, Kai Graeber, Per Wilhelmsson, Kristian K. Ullrich, Waheed Arshad, Christopher Grosche, Danuše Tarkowská, Veronika Turečková, Miroslav Strnad, Stefan A. Rensing, Gerhard Leubner-Metzger, Ortrun Mittelsten Scheid

The following Supplementary Information is available for this article:

- Fig. S1** Germination of dimorphic seed types in response to light.
- Fig. S2** Heatmap of all 87 genes light-regulated in *Aethionema arabicum* CYP seeds and differentially expressed in light-exposed TUR and CYP seeds based on RPKM (reads per kilobase of transcript per million mapped reads) values.
- Fig. S3** Identification of the Arabidopsis orthologue of *Aethionema* AA18G00108 as GA2ox3. (A) Gibberellin 2-oxidase family phylogeny based on protein sequences. (B) Synteny of GA2ox3 position in the genome of Arabidopsis and *Aethionema*.
- Fig. S4** Accumulation of GA forms in *Aethionema arabicum* TUR and CYP seeds under dark and light conditions.
- Fig. S5** Identification and alignments of phytochromes in *Aethionema arabicum*. (A) Phylogenetic tree of phytochromes. (B-F) Phytochrome A, B, C, D, E protein alignments of three *Aethionema arabicum* accessions.
- Fig. S6** Alignment of PIL5/PIF1 protein sequence of three *Aethionema arabicum* accessions.
- Table S1** Information about geographic origin of *Aethionema arabicum* accessions.
- Table S2** List of primers used for quantitative RT-PCR analysis.
- Table S3** List of *Aethionema* accession numbers used for this study.
- Dataset S1** List of differentially expressed *Aethionema arabicum* genes in TUR Dark versus TUR Light.
- Dataset S2** List of differentially expressed *Aethionema arabicum* genes in CYP Dark versus CYP Light.
- Dataset S3** List of differentially expressed *Aethionema arabicum* genes in CYP Dark versus TUR Dark.
- Dataset S4** List of differentially expressed *Aethionema arabicum* genes in CYP Light versus TUR Light.
- Dataset S5** List of common differentially expressed *Aethionema arabicum* genes in CYP Light versus TUR Light and TUR Dark versus TUR Light.

**Dataset S6** List of target genes of Arabidopsis PIL5/PIF1 and transcriptional changes of orthologues in the Aethionema experiments.

**Dataset S7** List of plant species for which protein sequences were considered for phylogenetic tree constructions.

### Supplementary Figure Legends

**Fig. S1** Germination of dimorphic seed types in response to light. Germination of mucilaginous (M+) and non-mucilaginous (M-) seeds were tested from TUR and CYP accessions in dark or under white light ( $100 \mu\text{mol m}^{-2} \text{s}^{-1}$ ). Images were taken 7 days after imbibition.

**Fig. S2** Heatmap of all 87 genes light-regulated in CYP seeds and differentially expressed in light-exposed TUR and CYP seeds based on RPKM values.

**Fig. S3** Identification of the *A. thaliana* orthologue of *Ae. arabicum* AA18G00108 as GA2ox3. **(a)** Phylogenetic tree of gibberelin2-oxidases using Bayesian inference (2000000 generations, standard deviation of split frequencies 0.063371) and allows clear assignment of *Ae. arabicum* orthologues. Sequences of *A. thaliana* (ARATH) and *Ae. arabicum* (AETAR) are marked in green and red, respectively. For detailed assignment of five letter code see Supplemental Dataset 7. **(b)** Synteny of GA2ox3 position in the genome of *A. thaliana* and *Ae. arabicum*.

**Fig. S4** Accumulation of GA forms in *Ae. arabicum* TUR and CYP seeds under dark and light conditions.

**Fig. S5** Identification and alignments of phytochromes in *Ae. arabicum*. **(a)** Phylogenetic tree of phytochromes using Bayesian inference (1688500 generations, standard deviation of split frequencies 0.009992) and allows clear assignment of *Ae. arabicum* orthologues. Sequences of *A. thaliana* (ARATH) and *Ae. arabicum* (AETAR) are marked in green and red, respectively. For detailed assignment of five letter code see Supplemental Dataset 7. **(b-f)** Phytochrome protein alignments of three *Ae. arabicum* accessions. Germination of TUR seeds is light-insensitive while CYP and KM2397 both have light inhibited germination.

**Fig. S6** Alignment of PIL5/PIF1 protein sequence of three *Ae. arabicum* accessions. Germination of TUR seeds is light-insensitive while CYP and KM2397 both have light inhibited germination.

**Table S1 Information about geographic origin of *Aethionema arabicum* accessions**

| ID number  | Species                                        | Origin | Region                      | Altitude | Seed source                             |
|------------|------------------------------------------------|--------|-----------------------------|----------|-----------------------------------------|
| KM2491     | <i>Aethionema heterocarpum</i>                 | Israel | Golan Heights, Mt. Hermonit | 1100 m   | S. Cohen                                |
| KM2614     | <i>Aethionema heterocarpum</i>                 | Turkey | Belen/Hatay                 | 700 m    | K. Mummenhoff                           |
| KM2496     | <i>Aethionema carneum</i> (Banks & Sol.) Fedts | Israel | Philistine Plain            | 39 m     | A. Singer, Israel Plant Gene Bank 21673 |
| KM2397     | <i>Aethionema arabicum</i> Andr. Ex DC.        | Turkey | Elazığ, Harput              | 1200 m   | E. Schranz                              |
| Iran8458   | <i>Aethionema arabicum</i> Andr. Ex DC.        | Iran   | Mt. Dizin, Karaj            | ~2600 m  | S. Mohammadin                           |
| Iran8456-1 | <i>Aethionema arabicum</i> Andr. Ex DC.        | Iran   | Mt. Touchal, Tehran         | ~2600 m  | S. Mohammadin                           |
| Iran8456-2 | <i>Aethionema arabicum</i> Andr. Ex DC.        | Iran   | Mt. Touchal, Tehran         | ~2600 m  | S. Mohammadin                           |

**Table S2 List of primers used for quantitative RT-PCR analysis**

| Name          | Nucleotide sequence        |
|---------------|----------------------------|
| AearACT2_for  | AATTGAGCATGGTGTGGTCA       |
| AearACT2_rev  | GCTCTTCAGGAGCAATACGG       |
| AearUBQ10_for | GAGGATGGCCGAACATTG         |
| AearUBQ10_rev | TGCCCGTTAGGGTTTTGA         |
| AearAPC2_for  | TCTCCTGCAATCGAGGACTT       |
| AearAPC2_rev  | GCAGTGAGCAACCGGTATTT       |
| AearNCED5_for | GCCGTTTGATCTTGACGCTC       |
| AearNCED5_rev | ACGGAGTTTAGTTTACGGCGT      |
| AearNCED6_for | GCTTCTTCAGCTCTCGACAA       |
| AearNCED6_rev | GAACCGTTGGATCAGTCGGT       |
| AearNCED9_for | TCCTTTTCTCCGATCAAACCTCT    |
| AearNCED9_rev | TCGAATTCGAGGATTTGGGGA      |
| AearABA1_for  | GGAGGAGAAGAAAGGGGAGA       |
| AearABA1_rev  | ATCCTTTCTTTTTTCGCAGCA      |
| AearABA2_for  | AACATGGCGCAAGAGTCTG        |
| AearABA2_rev  | TGGATGAAACAAGCCTCCTT       |
| AearABA3_for  | TGGAAGAATTTCTTGAGGAATTTGGA |
| AearABA3_rev  | TCTTGAATTCGGTGTACGGA       |

|                  |                         |
|------------------|-------------------------|
| AearCYP707A2_for | GCGGTTCCAACAAAGAAAAC    |
| AearCYP707A2_rev | GAGTGGCGAAGAAGGAATTG    |
| AearGA3ox1_for   | TCTTCGTCACCTCCCTGACT    |
| AearGA3ox1_rev   | GATGAGCGGGAGAGTTGTGT    |
| AearGA3ox2_for   | CCCATCCAATACACATTCCA    |
| AearGA3ox2_rev   | GCCTTGGCTGAGAAAAGAAG    |
| AearGA2ox2_for   | TCACAGCCCCTCACTTTAGA    |
| AearGA2ox2_rev   | GGCTTCTGGGTCGGTTAAAT    |
| AearGA2ox3_for   | CGCGTCTCTCTTAACCCAAC    |
| AearGA2ox3_rev   | TCACATGCCTTGACCATTTG    |
| AearRGA_for      | GTCCTCGGCTACAAGGTCAG    |
| AearRGA_rev      | TGAGGGAATCCATCTTCAGG    |
| AearGAI_for      | TGGTGGTGCTTCTGTACCTG    |
| AearGAI_rev      | TCATCCATGTGACCACCATC    |
| AearRGL2_for     | GGACCCTGCAACAATACCAT    |
| AearRGL2_rev     | CCACGCCTTCAACTTCCTTA    |
| AearSOM_for      | CCGCGAAAATTGATATCTCC    |
| AearSOM_rev      | TCGATTTGATTTCTCACCA     |
| AearDAG1_for     | GCAATTACTCCCCAATAACAACA |
| AearDAG1_rev     | GTTTGCGTTTTCGTTTGAG     |
| AearDAG2_for     | GGAACAACAACAACAACAATGA  |
| AearDAG2_rev     | CTACCGGAGATGGATGTGGT    |
| AearJMJ20_for    | ATGGGAATCGAGATTGTTGG    |
| AearJMJ20_rev    | CGGCTGGTTTTTATGCAAGT    |
| AearJMJ22_for    | GGGAATGAGCGACCTGATTA    |
| AearJMJ22_rev    | TCACTGCATTCCAAGCAGAC    |
| AearPAR1_for     | CTCTAGCAACTCCCGACACC    |
| AearPAR1_rev     | TCTCCAACAATCTCCGTTTTG   |
| AearPAR2_for     | CGTCACTTCAGCGAGTGAAA    |
| AearPAR2_rev     | TTCCCGGA ACTATTGTCTGC   |
| AearDOG1_for     | CGCGTCACTAAGCGATCTAAC   |
| AearDOG1_rev     | GCCGCGTCTTCTTG TAGACTT  |
| AearABI3_for     | ATGGCGGAAACCTTCCTTAT    |
| AearABI3_rev     | GAGGAAGAGGAGGAGGAGGA    |
| AearABI4_for     | CTCAACGCAAACGCAAAGGT    |
| AearABI4_rev     | TCACGGATTT CAGCAACCCA   |
| AearABI5_for     | GAACGCCGAAGAAAACAATC    |
| AearABI5_rev     | TCAACCCGGTTTGGTACATT    |

**Table S3 List of Aethionema accession numbers used for this study**

| <b>Name</b>         | <b>Accession number</b> |
|---------------------|-------------------------|
| <i>AearNCED5</i>    | AA54G00417              |
| <i>AearNCED6</i>    | AA78G00012              |
| <i>AearNCED9</i>    | AA31G00716              |
| <i>AearABA1</i>     | AA8G00025               |
| <i>AearABA2</i>     | AA32G01008              |
| <i>AearABA3</i>     | AA37G00095              |
| <i>AearCYP707A2</i> | AA32G00787              |
| <i>AearGA3ox1</i>   | AA37G00176              |
| <i>AearGA3ox2</i>   | AA31G00895              |
| <i>AearGA2ox2</i>   | AA54G00411              |
| <i>AearGA2ox3</i>   | AA18G00108              |
| <i>AearRGA</i>      | AA14G00090              |
| <i>AearGAI</i>      | AA53G00639              |
| <i>AearRGL2</i>     | AA10G00264              |
| <i>AearPIL5</i>     | AA33G00286              |
| <i>AearSOM</i>      | AA7G00098               |
| <i>AearDAG1</i>     | AA61G00535              |
| <i>AearDAG2</i>     | AA21G00391              |
| <i>AearJMJ20</i>    | AA5G00018               |
| <i>AearJMJ22</i>    | AA283G00008             |
| <i>AearPAR1</i>     | AA21G00074              |
| <i>AearPAR2</i>     | AA61G00301              |
| <i>AearDOG1</i>     | AA6G00020               |
| <i>AearABI3</i>     | AA109G00007             |
| <i>AearABI4</i>     | AA29G00257              |
| <i>AearABI5</i>     | AA60G00170              |
| <i>AearPHYA</i>     | AA65G00005              |
| <i>AearPHYB</i>     | AA26G00394              |
| <i>AearPHYC</i>     | AA1057G00001            |
| <i>AearPHYD</i>     | AA18G00159              |
| <i>AearPHYE</i>     | AA57G00083              |
